## Correction

**Correction: An hTERT/ZEB1 complex directly regulates E-cadherin to promote epithelial-to-mesenchymal transition (EMT) in colorectal cancer****Yong Qin<sup>1</sup>, Bo Tang<sup>1</sup>, Chang-Jiang Hu<sup>1</sup>, Yu-Feng Xiao<sup>1</sup>, Rui Xie<sup>1</sup>, Xin Yong<sup>1</sup>, Yu-Yun Wu<sup>1</sup>, Hui Dong<sup>1</sup> and Shi-Ming Yang<sup>1</sup>**<sup>1</sup>Department of Gastroenterology, Xinqiao Hospital, Third Military Medical University, Chongqing 400037, P.R. China**Published:****Copyright:** © 2021 Qin et al. This is an open access article distributed under the terms of the [Creative Commons Attribution License](https://creativecommons.org/licenses/by/3.0/) (CC BY 3.0), which permits unrestricted use, distribution, and reproduction in any medium, provided the original author and source are credited.**This article has been corrected:** This article has been corrected: Due to errors during figure preparation, two images in Figure 6E contain a partial overlap - specifically, the 2nd and 3rd images in row 1. The corrected Figure 6E is shown below. The authors declare that these corrections do not change the results or conclusions of this paper.Original article: Oncotarget. 2016; 7:351–361. <https://doi.org/10.18632/oncotarget.5968>

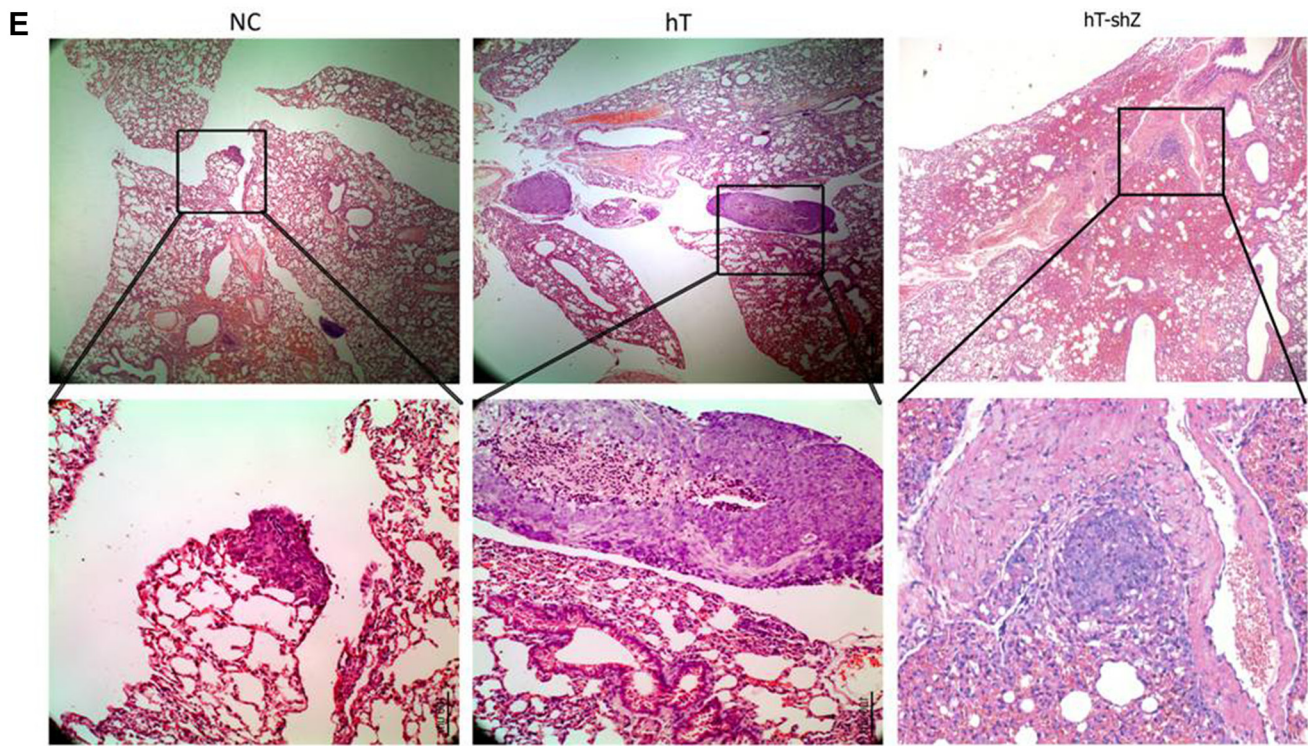

**Figure 6:** (E) Metastasis observed after intravenous injection of cells. Metastases were observed by H&E staining at different magnifications.
